# Supplementary material
Source: PubMed Central journal article supplement (PMC4283410)

A

## Sgf73 – HAT module crosslinks

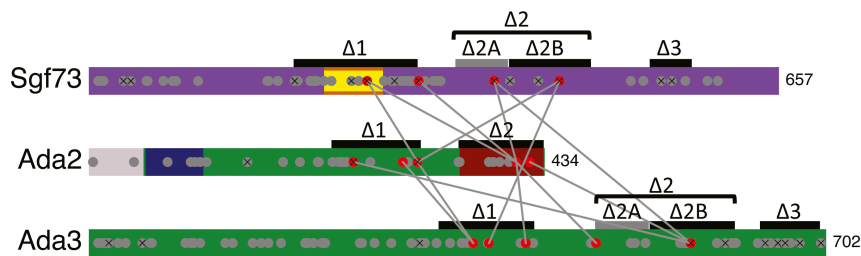

B

## Sgf73-Taf-like subunit crosslinks

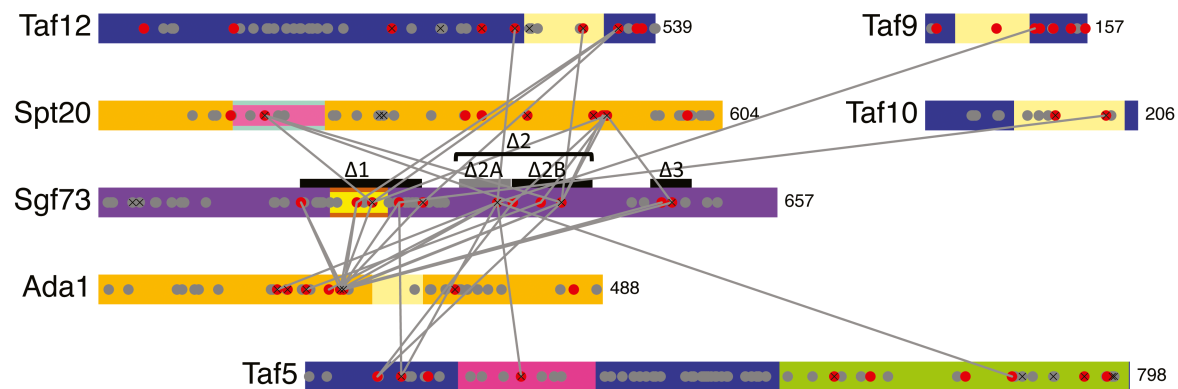

C

## HAT module – Taf-like subunit crosslinks

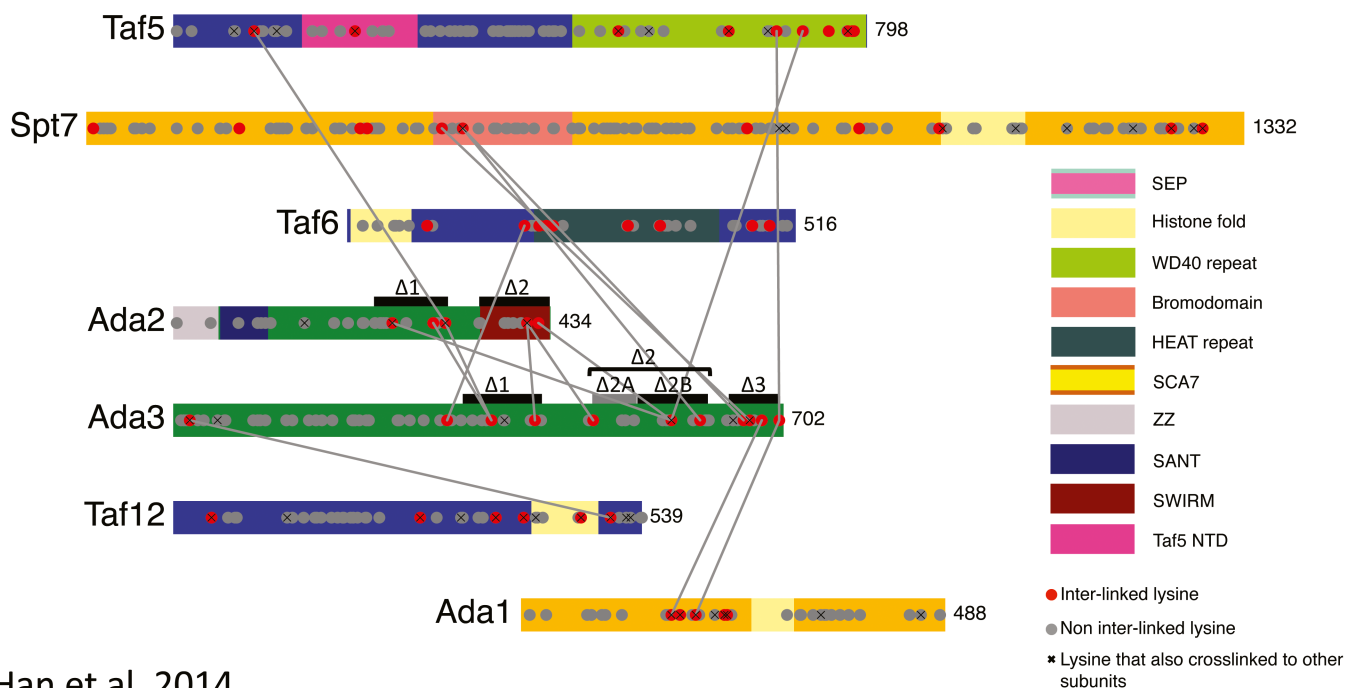

Supplement: embj0033-2534-sd9.pdf [file embj0033-2534-sd9.pdf]
