# Supplementary material
Source: PubMed Central journal article supplement (PMC4283410)
Supplement: embj0033-2534-sd14.pdf [file embj0033-2534-sd14.pdf]

Table S1. Sequence coverage of WT SAGA complex.

| <b>SAGA subunit</b> | <b>Sequence coverage [%]</b> |      |      |      |      |      |
|---------------------|------------------------------|------|------|------|------|------|
|                     | a                            | b    | c    | d    | 2mM  | 5mM  |
| <b>Gcn5</b>         | 81.8                         | 81.8 | 81.8 | 81.5 | 34.4 | 21.9 |
| <b>Ada2</b>         | 77.6                         | 77.6 | 77.6 | 77.4 | 26.3 | 24.4 |
| <b>Ada3</b>         | 77.6                         | 78.8 | 74.9 | 78.8 | 48.3 | 31.6 |
| <b>Sgf29</b>        | 81.9                         | 81.9 | 78.8 | 81.9 | 53.3 | 49   |
| <b>Ubp8</b>         | 82                           | 82.8 | 80.7 | 82.8 | 29.9 | 16.6 |
| <b>Sgf11</b>        | 77.8                         | 77.8 | 77.8 | 77.8 | 0    | 0    |
| <b>Sgf73</b>        | 50.5                         | 50.5 | 50.5 | 50.5 | 27.7 | 22.2 |
| <b>Sus1</b>         | 85.4                         | 85.4 | 85.4 | 85.4 | 21.9 | 0    |
| <b>Spt7</b>         | 84.2                         | 86.9 | 85.7 | 86.4 | 40.9 | 33.1 |
| <b>Spt8</b>         | 77.1                         | 77.1 | 77.1 | 77.1 | 44   | 35   |
| <b>Spt20</b>        | 73.8                         | 74   | 73.8 | 73.7 | 47   | 45.2 |
| <b>Spt3</b>         | 62.9                         | 62.9 | 62.9 | 62.9 | 27.3 | 27   |
| <b>Ada1</b>         | 72.1                         | 74.2 | 74.2 | 71.9 | 24.4 | 24.4 |
| <b>Tra1</b>         | 77.8                         | 78   | 78.6 | 79.6 | 26.1 | 21.9 |
| <b>Taf10</b>        | 64.1                         | 67.5 | 67.5 | 67.5 | 35.4 | 24.3 |
| <b>Taf12</b>        | 72                           | 75.3 | 67.5 | 82.4 | 33.6 | 31.9 |
| <b>Taf9</b>         | 77.7                         | 79   | 79   | 79   | 52.2 | 52.9 |
| <b>Taf6</b>         | 68.4                         | 68.6 | 68.6 | 68.6 | 46.3 | 39.1 |
| <b>Taf5</b>         | 71.9                         | 73.9 | 79.9 | 79.9 | 45.4 | 48.1 |
| <b>Chd1</b>         | 0                            | 0    | 0.8  | 0.7  | 0    | 0    |
