# Supplementary material
Source: PubMed Central journal article supplement (PMC4283410)
Supplement: embj0033-2534-sd15.pdf [file embj0033-2534-sd15.pdf]

Table S3. Distance measurements in known 3D structures.

| <b>Subunit (PDB ID)</b>        | <b>Residue 1</b> | <b>Residue 2</b> | <b>C<math>\alpha</math> distance (Å)</b> |
|--------------------------------|------------------|------------------|------------------------------------------|
| <b>Ubp8 (3MHH)</b>             | 15               | 22               | 10.5                                     |
|                                | 181              | T200             | 23.7*                                    |
| <b>Sgf29 (3MP8)</b>            | 134              | 181              | 8.8                                      |
|                                | 151              | 177              | 9.1                                      |
|                                | 200              | 237              | 16.1                                     |
|                                | 220              | 237              | 16.1                                     |
|                                | 134              | 237              | 25.6                                     |
|                                | 177              | 237              | 36**                                     |
| <b>Gcn5 bromodomain (1E6I)</b> | 422              | 429              | 10.5                                     |
|                                | 415              | 422              | 10.8                                     |
|                                | R329             | 385              | 13.1*                                    |
| <b>Gcn5 HAT domain (1YGH)</b>  | 126              | 133              | 8.9                                      |
|                                | 111              | 153              | 16.6                                     |
| <b>TBP (1YTB)</b>              | 133              | 156              | 8.7                                      |
|                                | 83               | 97               | 12.8                                     |
|                                | 83               | 145              | 15.2                                     |
|                                | 83               | 167              | 49.6**                                   |
| <b>DUB (3MHH)</b>              | Ubp8 K22         | Sgf73 K33        | 11.8                                     |
|                                | Ubp8 K22         | Sgf73 K40        | 15                                       |

\* One of the lysines is missing in the structure. Distance to the C $\alpha$  of the adjacent residue (R329 instead of K328 in Gcn5 bromodomain; T200 instead of K201 in Ubp8) was measured.

\*\* Distances that are larger than the 30Å cut-off.
