# Supplementary material
Source: PubMed Central journal article supplement (PMC4283410)
Supplement: embj0033-2534-sd16.pdf [file embj0033-2534-sd16.pdf]

Table S4. (A) List of iBAQ values for SAGA subunits.

| SAGA subunits | iBAQ               |                    |           |           |           |           |                     |                     |                    |                    |
|---------------|--------------------|--------------------|-----------|-----------|-----------|-----------|---------------------|---------------------|--------------------|--------------------|
|               | Sgf73 $\Delta$ 4 a | Sgf73 $\Delta$ 4 b | WT a      | WT b      | WT c      | WT d      | Sgf73 $\Delta$ 2A a | Sgf73 $\Delta$ 2A b | Ada3 $\Delta$ 2A a | Ada3 $\Delta$ 2A b |
| <b>Gcn5</b>   | 203370000          | 114760000          | 443460000 | 403580000 | 226960000 | 410860000 | 151880000           | 81262000            | 73338              | 63005              |
| <b>Ada2</b>   | 153200000          | 89191000           | 685210000 | 463620000 | 316480000 | 583770000 | 144830000           | 64448000            | 79984              | 139100             |
| <b>Ada3</b>   | 206720000          | 122900000          | 550030000 | 544240000 | 287210000 | 588440000 | 126290000           | 63638000            | 24232              | 16242              |
| <b>Sgf29</b>  | 188050000          | 65012000           | 398350000 | 322340000 | 105170000 | 428040000 | 142870000           | 55002000            | 33838              | 13386              |
| <b>Ubp8</b>   | 0                  | 0                  | 235360000 | 220890000 | 98801000  | 272620000 | 0                   | 0                   | 27890000           | 28046000           |
| <b>Sgf11</b>  | 0                  | 0                  | 122330000 | 262880000 | 67732000  | 192490000 | 0                   | 0                   | 7523000            | 6380800            |
| <b>Sgf73</b>  | 179610000          | 140010000          | 457780000 | 528720000 | 428590000 | 542740000 | 0                   | 0                   | 69686000           | 62334000           |
| <b>Sus1</b>   | 0                  | 0                  | 389590000 | 288680000 | 177840000 | 332870000 | 0                   | 0                   | 47205000           | 44718000           |
| <b>Spt7</b>   | 267550000          | 170720000          | 423730000 | 427650000 | 388930000 | 503670000 | 284040000           | 169770000           | 61263000           | 62933000           |
| <b>Spt8</b>   | 212680000          | 150780000          | 654970000 | 438390000 | 526350000 | 681380000 | 336920000           | 214500000           | 50883000           | 91161000           |
| <b>Spt20</b>  | 181160000          | 152700000          | 568340000 | 522790000 | 413690000 | 630780000 | 241750000           | 110370000           | 72579000           | 76491000           |
| <b>Spt3</b>   | 228660000          | 126070000          | 469390000 | 492100000 | 492210000 | 695690000 | 264560000           | 135080000           | 49056000           | 56984000           |
| <b>Ada1</b>   | 252000000          | 190750000          | 515640000 | 523410000 | 448630000 | 616410000 | 191500000           | 105860000           | 76584000           | 59869000           |
| <b>Tra1</b>   | 118940000          | 70123000           | 268810000 | 237470000 | 210280000 | 323930000 | 51849000            | 36005000            | 21697000           | 27141000           |
| <b>Taf10</b>  | 231070000          | 123840000          | 669010000 | 485330000 | 378360000 | 719000000 | 269900000           | 148840000           | 77929000           | 43449000           |
| <b>Taf12</b>  | 227460000          | 168740000          | 356020000 | 450740000 | 337630000 | 395390000 | 215100000           | 111780000           | 41479000           | 39914000           |
| <b>Taf9</b>   | 268530000          | 209860000          | 520150000 | 727490000 | 496080000 | 689760000 | 326140000           | 187150000           | 75973000           | 62915000           |
| <b>Taf6</b>   | 299440000          | 192980000          | 832190000 | 656430000 | 590600000 | 820680000 | 302720000           | 176200000           | 92558000           | 79915000           |
| <b>Taf5</b>   | 203640000          | 155010000          | 470990000 | 445820000 | 366540000 | 479960000 | 246100000           | 138390000           | 58762000           | 69340000           |
| <b>Chd1</b>   | 0                  | 0                  | 0         | 0         | 9693.3    | 0         | 9206.8              | 6482.9              | 0                  | 0                  |

Table S4. (B) List of adjNSAF values for SAGA subunits.

| SAGA subunits | adjNSAF            |                    |            |            |            |            |                     |                     |                    |                    |
|---------------|--------------------|--------------------|------------|------------|------------|------------|---------------------|---------------------|--------------------|--------------------|
|               | Sgf73 $\Delta$ 4 a | Sgf73 $\Delta$ 4 b | WT a       | WT b       | WT c       | WT d       | Sgf73 $\Delta$ 2A a | Sgf73 $\Delta$ 2A b | Ada3 $\Delta$ 2A a | Ada3 $\Delta$ 2A b |
| <b>Gcn5</b>   | 0.02589699         | 0.01735487         | 0.02577707 | 0.02352921 | 0.01408449 | 0.02140644 | 0.02329172          | 0.01916568          | 0.00049374         | 0.00093988         |
| <b>Ada2</b>   | 0.02684144         | 0.01788247         | 0.03063988 | 0.03030305 | 0.01858707 | 0.03398785 | 0.02891386          | 0.01671689          | 0.00033294         | 0.00047534         |
| <b>Ada3</b>   | 0.03171692         | 0.02070928         | 0.03217602 | 0.03304939 | 0.0186637  | 0.03231774 | 0.03188945          | 0.01921033          | 0.0011022          | 0.00052454         |
| <b>Sgf29</b>  | 0.0243476          | 0.01235178         | 0.02365979 | 0.0182888  | 0.00763474 | 0.01954024 | 0.01814067          | 0.01269165          | 0.00027852         | 0.00053019         |
| <b>Ubp8</b>   | 0                  | 0                  | 0.02837378 | 0.02563218 | 0.01425793 | 0.02479277 | 0                   | 0                   | 0.03267869         | 0.02380224         |
| <b>Sgf11</b>  | 0                  | 0                  | 0.01858279 | 0.01745539 | 0.01355632 | 0.02169186 | 0                   | 0                   | 0.02172443         | 0.0144741          |
| <b>Sgf73</b>  | 0.02471318         | 0.0189023          | 0.02239829 | 0.0240581  | 0.01604037 | 0.02368372 | 0                   | 0                   | 0.02509204         | 0.01843567         |
| <b>Sus1</b>   | 0                  | 0                  | 0.04029684 | 0.04157522 | 0.01996513 | 0.05884933 | 0                   | 0                   | 0.08659909         | 0.06608203         |
| <b>Spt7</b>   | 0.04078837         | 0.02896392         | 0.035909   | 0.03531085 | 0.02625983 | 0.03580052 | 0.05093426          | 0.0345652           | 0.05204302         | 0.04296779         |
| <b>Spt8</b>   | 0.03627689         | 0.02662904         | 0.0309235  | 0.03094396 | 0.02770037 | 0.03502657 | 0.05166282          | 0.04185338          | 0.04815642         | 0.04252044         |
| <b>Spt20</b>  | 0.04813179         | 0.03786517         | 0.05094512 | 0.04218344 | 0.02992954 | 0.04510096 | 0.0493746           | 0.03514971          | 0.06331803         | 0.04534191         |
| <b>Spt3</b>   | 0.02913388         | 0.02153643         | 0.03583092 | 0.03668445 | 0.02621309 | 0.0393507  | 0.04479177          | 0.02946923          | 0.05013329         | 0.0352778          |
| <b>Ada1</b>   | 0.03207621         | 0.02641557         | 0.03459457 | 0.02855687 | 0.02396019 | 0.03046807 | 0.0302459           | 0.02161897          | 0.03568907         | 0.02678039         |
| <b>Tra1</b>   | 0.02727105         | 0.02107626         | 0.02727404 | 0.02312813 | 0.01742697 | 0.02508946 | 0.01788083          | 0.0163009           | 0.02496327         | 0.02186436         |
| <b>Taf10</b>  | 0.02990194         | 0.02275432         | 0.03714701 | 0.03053166 | 0.02385688 | 0.03391939 | 0.03234961          | 0.02833993          | 0.04512804         | 0.03362971         |
| <b>Taf12</b>  | 0.0293073          | 0.02563883         | 0.02717407 | 0.03143307 | 0.02053173 | 0.02981045 | 0.02922248          | 0.02184044          | 0.03325715         | 0.02476168         |
| <b>Taf9</b>   | 0.0378398          | 0.0257459          | 0.03325597 | 0.03733365 | 0.02144988 | 0.03179353 | 0.04238209          | 0.02513935          | 0.05637352         | 0.02879115         |
| <b>Taf6</b>   | 0.03401234         | 0.02581317         | 0.02850691 | 0.02980444 | 0.0195722  | 0.02771382 | 0.0574409           | 0.03155866          | 0.05406595         | 0.04439416         |
| <b>Taf5</b>   | 0.02500107         | 0.02134722         | 0.02518232 | 0.0240312  | 0.01696661 | 0.02200479 | 0.04000987          | 0.02271473          | 0.03752154         | 0.02656905         |
| <b>Chd1</b>   | 0                  | 0                  | 0          | 0          | 0.00003296 | 0.00003886 | 0                   | 0.0001248           | 0                  | 0                  |
