# Supplementary material
Source: PubMed Central journal article supplement (PMC4283410)
Supplement: embj0033-2534-sd17.pdf [file embj0033-2534-sd17.pdf]

Table S5. (A) Yeast strains used in this study.

| <b>Strain</b> | <b>Plasmid</b> | <b>Strain background</b>                                                                                                                                                                                                                                                      |
|---------------|----------------|-------------------------------------------------------------------------------------------------------------------------------------------------------------------------------------------------------------------------------------------------------------------------------|
| <b>SHY627</b> | none           | <i>mata</i> , $\Delta$ <i>ade2::hisG</i> , <i>his3</i> $\Delta$ 200, <i>leu2</i> $\Delta$ 0, <i>lys2</i> $\Delta$ 0, <i>met15</i> $\Delta$ 0, <i>trp1</i> $\Delta$ 63, <i>ura3</i> $\Delta$ 0, <i>SPT7</i> -( <i>Flag1</i> )- <i>TAP::TRP1</i>                                |
| <b>YHY8</b>   | pYH1           | <i>mata</i> , $\Delta$ <i>ade2::hisG</i> , <i>his3</i> $\Delta$ 200, <i>leu2</i> $\Delta$ 0, <i>lys2</i> $\Delta$ 0, <i>met15</i> $\Delta$ 0, <i>trp1</i> $\Delta$ 63, <i>ura3</i> $\Delta$ 0, <i>SPT7</i> -( <i>Flag1</i> )- <i>TAP::TRP1</i> , $\Delta$ <i>spt3::HPH</i>    |
| <b>YHY28</b>  | pRS316         | <i>mata</i> , $\Delta$ <i>ade2::hisG</i> , <i>his3</i> $\Delta$ 200, <i>leu2</i> $\Delta$ 0, <i>lys2</i> $\Delta$ 0, <i>met15</i> $\Delta$ 0, <i>trp1</i> $\Delta$ 63, <i>ura3</i> $\Delta$ 0, <i>SPT7</i> -( <i>Flag1</i> )- <i>TAP::TRP1</i> , $\Delta$ <i>sgf73::KanMX</i> |
| <b>YHY29</b>  | pYH28          | <i>mata</i> , $\Delta$ <i>ade2::hisG</i> , <i>his3</i> $\Delta$ 200, <i>leu2</i> $\Delta$ 0, <i>lys2</i> $\Delta$ 0, <i>met15</i> $\Delta$ 0, <i>trp1</i> $\Delta$ 63, <i>ura3</i> $\Delta$ 0, <i>SPT7</i> -( <i>Flag1</i> )- <i>TAP::TRP1</i> , $\Delta$ <i>sgf73::KanMX</i> |
| <b>YHY30</b>  | pYH31          | <i>mata</i> , $\Delta$ <i>ade2::hisG</i> , <i>his3</i> $\Delta$ 200, <i>leu2</i> $\Delta$ 0, <i>lys2</i> $\Delta$ 0, <i>met15</i> $\Delta$ 0, <i>trp1</i> $\Delta$ 63, <i>ura3</i> $\Delta$ 0, <i>SPT7</i> -( <i>Flag1</i> )- <i>TAP::TRP1</i> , $\Delta$ <i>sgf73::KanMX</i> |
| <b>YHY31</b>  | pYH32          | <i>mata</i> , $\Delta$ <i>ade2::hisG</i> , <i>his3</i> $\Delta$ 200, <i>leu2</i> $\Delta$ 0, <i>lys2</i> $\Delta$ 0, <i>met15</i> $\Delta$ 0, <i>trp1</i> $\Delta$ 63, <i>ura3</i> $\Delta$ 0, <i>SPT7</i> -( <i>Flag1</i> )- <i>TAP::TRP1</i> , $\Delta$ <i>sgf73::KanMX</i> |
| <b>YHY32</b>  | pYH33          | <i>mata</i> , $\Delta$ <i>ade2::hisG</i> , <i>his3</i> $\Delta$ 200, <i>leu2</i> $\Delta$ 0, <i>lys2</i> $\Delta$ 0, <i>met15</i> $\Delta$ 0, <i>trp1</i> $\Delta$ 63, <i>ura3</i> $\Delta$ 0, <i>SPT7</i> -( <i>Flag1</i> )- <i>TAP::TRP1</i> , $\Delta$ <i>sgf73::KanMX</i> |
| <b>YHY33</b>  | pRS316         | <i>mata</i> , $\Delta$ <i>ade2::hisG</i> , <i>his3</i> $\Delta$ 200, <i>leu2</i> $\Delta$ 0, <i>lys2</i> $\Delta$ 0, <i>met15</i> $\Delta$ 0, <i>trp1</i> $\Delta$ 63, <i>ura3</i> $\Delta$ 0, <i>SPT7</i> -( <i>Flag1</i> )- <i>TAP::TRP1</i> , $\Delta$ <i>ada2::KanMX</i>  |
| <b>YHY37</b>  | pRS316         | <i>mata</i> , $\Delta$ <i>ade2::hisG</i> , <i>his3</i> $\Delta$ 200, <i>leu2</i> $\Delta$ 0, <i>lys2</i> $\Delta$ 0, <i>met15</i> $\Delta$ 0, <i>trp1</i> $\Delta$ 63, <i>ura3</i> $\Delta$ 0, <i>SPT7</i> -( <i>Flag1</i> )- <i>TAP::TRP1</i> , $\Delta$ <i>ada3::KanMX</i>  |
| <b>YHY38</b>  | pYH30          | <i>mata</i> , $\Delta$ <i>ade2::hisG</i> , <i>his3</i> $\Delta$ 200, <i>leu2</i> $\Delta$ 0, <i>lys2</i> $\Delta$ 0, <i>met15</i> $\Delta$ 0, <i>trp1</i> $\Delta$ 63, <i>ura3</i> $\Delta$ 0, <i>SPT7</i> -( <i>Flag1</i> )- <i>TAP::TRP1</i> , $\Delta$ <i>ada3::KanMX</i>  |
| <b>YHY39</b>  | pYH36          | <i>mata</i> , $\Delta$ <i>ade2::hisG</i> , <i>his3</i> $\Delta$ 200, <i>leu2</i> $\Delta$ 0, <i>lys2</i> $\Delta$ 0, <i>met15</i> $\Delta$ 0, <i>trp1</i> $\Delta$ 63, <i>ura3</i> $\Delta$ 0, <i>SPT7</i> -( <i>Flag1</i> )- <i>TAP::TRP1</i> , $\Delta$ <i>ada3::KanMX</i>  |
| <b>YHY40</b>  | pYH37          | <i>mata</i> , $\Delta$ <i>ade2::hisG</i> , <i>his3</i> $\Delta$ 200, <i>leu2</i> $\Delta$ 0, <i>lys2</i> $\Delta$ 0, <i>met15</i> $\Delta$ 0, <i>trp1</i> $\Delta$ 63, <i>ura3</i> $\Delta$ 0, <i>SPT7</i> -( <i>Flag1</i> )- <i>TAP::TRP1</i> , $\Delta$ <i>ada3::KanMX</i>  |
| <b>YHY41</b>  | pYH38          | <i>mata</i> , $\Delta$ <i>ade2::hisG</i> , <i>his3</i> $\Delta$ 200, <i>leu2</i> $\Delta$ 0, <i>lys2</i> $\Delta$ 0, <i>met15</i> $\Delta$ 0, <i>trp1</i> $\Delta$ 63, <i>ura3</i> $\Delta$ 0, <i>SPT7</i> -( <i>Flag1</i> )- <i>TAP::TRP1</i> , $\Delta$ <i>ada3::KanMX</i>  |
| <b>YHY52</b>  | pRS316         | <i>mata</i> , $\Delta$ <i>ade2::hisG</i> , <i>his3</i> $\Delta$ 200, <i>leu2</i> $\Delta$ 0, <i>lys2</i> $\Delta$ 0, <i>met15</i> $\Delta$ 0, <i>trp1</i> $\Delta$ 63, <i>ura3</i> $\Delta$ 0, <i>Sgf73-3HA::His3MX6</i> , $\Delta$ <i>ada2::KanMX</i>                        |
| <b>YHY56</b>  | pRS316         | <i>mata</i> , $\Delta$ <i>ade2::hisG</i> , <i>his3</i> $\Delta$ 200, <i>leu2</i> $\Delta$ 0, <i>lys2</i> $\Delta$ 0, <i>met15</i> $\Delta$ 0, <i>trp1</i> $\Delta$ 63, <i>ura3</i> $\Delta$ 0, <i>Sgf73-3HA::His3MX6</i> , $\Delta$ <i>ada3::KanMX</i>                        |
| <b>YHY57</b>  | pYH30          | <i>mata</i> , $\Delta$ <i>ade2::hisG</i> , <i>his3</i> $\Delta$ 200, <i>leu2</i> $\Delta$ 0, <i>lys2</i> $\Delta$ 0, <i>met15</i>                                                                                                                                             |

|              |        |                                                                                                                           |
|--------------|--------|---------------------------------------------------------------------------------------------------------------------------|
|              |        | <i>Δo, trp1 Δ63, ura3 Δo, Sgf73-3HA::His3MX6, Δada3::KanMX</i>                                                            |
| <b>YHY58</b> | pYH36  | <i>mata, Δade2::hisG, his3 Δ200, leu2 Δo, lys2 Δo, met15 Δo, trp1 Δ63, ura3 Δo, Sgf73-3HA::His3MX6, Δada3::KanMX</i>      |
| <b>YHY59</b> | pYH37  | <i>mata, Δade2::hisG, his3 Δ200, leu2 Δo, lys2 Δo, met15 Δo, trp1 Δ63, ura3 Δo, Sgf73-3HA::His3MX6, Δada3::KanMX</i>      |
| <b>YHY60</b> | pYH38  | <i>mata, Δade2::hisG, his3 Δ200, leu2 Δo, lys2 Δo, met15 Δo, trp1 Δ63, ura3 Δo, Sgf73-3HA::His3MX6, Δada3::KanMX</i>      |
| <b>YHY62</b> | pYH39  | <i>mata, Δade2::hisG, his3 Δ200, leu2 Δo, lys2 Δo, met15 Δo, trp1 Δ63, ura3 Δo, SPT7-(Flag1)-TAP::TRP1, Δsgf73::KanMX</i> |
| <b>YHY63</b> | pYH40  | <i>mata, Δade2::hisG, his3 Δ200, leu2 Δo, lys2 Δo, met15 Δo, trp1 Δ63, ura3 Δo, SPT7-(Flag1)-TAP::TRP1, Δsgf73::KanMX</i> |
| <b>YHY66</b> | pYH41  | <i>mata, Δade2::hisG, his3 Δ200, leu2 Δo, lys2 Δo, met15 Δo, trp1 Δ63, ura3 Δo, SPT7-(Flag1)-TAP::TRP1, Δada3::KanMX</i>  |
| <b>YHY67</b> | pYH42  | <i>mata, Δade2::hisG, his3 Δ200, leu2 Δo, lys2 Δo, met15 Δo, trp1 Δ63, ura3 Δo, SPT7-(Flag1)-TAP::TRP1, Δada3::KanMX</i>  |
| <b>YHY68</b> | pYH41  | <i>mata, Δade2::hisG, his3 Δ200, leu2 Δo, lys2 Δo, met15 Δo, trp1 Δ63, ura3 Δo, Sgf73-3HA::His3MX6, Δada3::KanMX</i>      |
| <b>YHY69</b> | pYH42  | <i>mata, Δade2::hisG, his3 Δ200, leu2 Δo, lys2 Δo, met15 Δo, trp1 Δ63, ura3 Δo, Sgf73-3HA::His3MX6, Δada3::KanMX</i>      |
| <b>YHY71</b> | pRS316 | <i>mata, Δade2::hisG, his3 Δ200, leu2 Δo, lys2 Δo, met15 Δo, trp1 Δ63, ura3 Δo, Ubp8-3HA::His3MX6, Δsgf73::KanMX</i>      |
| <b>YHY72</b> | pYH28  | <i>mata, Δade2::hisG, his3 Δ200, leu2 Δo, lys2 Δo, met15 Δo, trp1 Δ63, ura3 Δo, Ubp8-3HA::His3MX6, Δsgf73::KanMX</i>      |
| <b>YHY73</b> | pYH31  | <i>mata, Δade2::hisG, his3 Δ200, leu2 Δo, lys2 Δo, met15 Δo, trp1 Δ63, ura3 Δo, Ubp8-3HA::His3MX6, Δsgf73::KanMX</i>      |
| <b>YHY74</b> | pYH32  | <i>mata, Δade2::hisG, his3 Δ200, leu2 Δo, lys2 Δo, met15 Δo, trp1 Δ63, ura3 Δo, Ubp8-3HA::His3MX6, Δsgf73::KanMX</i>      |
| <b>YHY75</b> | pYH39  | <i>mata, Δade2::hisG, his3 Δ200, leu2 Δo, lys2 Δo, met15 Δo, trp1 Δ63, ura3 Δo, Ubp8-3HA::His3MX6, Δsgf73::KanMX</i>      |
| <b>YHY76</b> | pYH40  | <i>mata, Δade2::hisG, his3 Δ200, leu2 Δo, lys2 Δo, met15 Δo, trp1 Δ63, ura3 Δo, Ubp8-3HA::His3MX6, Δsgf73::KanMX</i>      |

|              |       |                                                                                                                                                                                                                                                             |
|--------------|-------|-------------------------------------------------------------------------------------------------------------------------------------------------------------------------------------------------------------------------------------------------------------|
| <b>YHY77</b> | pYH33 | <i>mata</i> , $\Delta$ <i>ade2::hisG</i> , <i>his3</i> $\Delta$ 200, <i>leu2</i> $\Delta$ 0, <i>lys2</i> $\Delta$ 0, <i>met15</i> $\Delta$ 0, <i>trp1</i> $\Delta$ 63, <i>ura3</i> $\Delta$ 0, <i>Ubp8-3HA::His3MX6</i> , $\Delta$ <i>sgf73::KanMX</i>      |
| <b>YHY78</b> | pYH57 | <i>mata</i> , $\Delta$ <i>ade2::hisG</i> , <i>his3</i> $\Delta$ 200, <i>leu2</i> $\Delta$ 0, <i>lys2</i> $\Delta$ 0, <i>met15</i> $\Delta$ 0, <i>trp1</i> $\Delta$ 63, <i>ura3</i> $\Delta$ 0, <i>Sgf73-3HA::His3MX6</i> , $\Delta$ <i>ada2::KanMX</i>      |
| <b>YHY79</b> | pYH58 | <i>mata</i> , $\Delta$ <i>ade2::hisG</i> , <i>his3</i> $\Delta$ 200, <i>leu2</i> $\Delta$ 0, <i>lys2</i> $\Delta$ 0, <i>met15</i> $\Delta$ 0, <i>trp1</i> $\Delta$ 63, <i>ura3</i> $\Delta$ 0, <i>Sgf73-3HA::His3MX6</i> , $\Delta$ <i>ada2::KanMX</i>      |
| <b>YHY80</b> | pYH59 | <i>mata</i> , $\Delta$ <i>ade2::hisG</i> , <i>his3</i> $\Delta$ 200, <i>leu2</i> $\Delta$ 0, <i>lys2</i> $\Delta$ 0, <i>met15</i> $\Delta$ 0, <i>trp1</i> $\Delta$ 63, <i>ura3</i> $\Delta$ 0, <i>Sgf73-3HA::His3MX6</i> , $\Delta$ <i>ada2::KanMX</i>      |
| <b>YHY81</b> | pYH57 | <i>mata</i> , $\Delta$ <i>ade2::hisG</i> , <i>his3</i> $\Delta$ 200, <i>leu2</i> $\Delta$ 0, <i>lys2</i> $\Delta$ 0, <i>met15</i> $\Delta$ 0, <i>trp1</i> $\Delta$ 63, <i>ura3</i> $\Delta$ 0, <i>SPT7-(Flag1)-TAP::TRP1</i> , $\Delta$ <i>ada2::KanMX</i>  |
| <b>YHY82</b> | pYH58 | <i>mata</i> , $\Delta$ <i>ade2::hisG</i> , <i>his3</i> $\Delta$ 200, <i>leu2</i> $\Delta$ 0, <i>lys2</i> $\Delta$ 0, <i>met15</i> $\Delta$ 0, <i>trp1</i> $\Delta$ 63, <i>ura3</i> $\Delta$ 0, <i>SPT7-(Flag1)-TAP::TRP1</i> , $\Delta$ <i>ada2::KanMX</i>  |
| <b>YHY83</b> | pYH59 | <i>mata</i> , $\Delta$ <i>ade2::hisG</i> , <i>his3</i> $\Delta$ 200, <i>leu2</i> $\Delta$ 0, <i>lys2</i> $\Delta$ 0, <i>met15</i> $\Delta$ 0, <i>trp1</i> $\Delta$ 63, <i>ura3</i> $\Delta$ 0, <i>SPT7-(Flag1)-TAP::TRP1</i> , $\Delta$ <i>ada2::KanMX</i>  |
| <b>YHY85</b> | pYH67 | <i>mata</i> , $\Delta$ <i>ade2::hisG</i> , <i>his3</i> $\Delta$ 200, <i>leu2</i> $\Delta$ 0, <i>lys2</i> $\Delta$ 0, <i>met15</i> $\Delta$ 0, <i>trp1</i> $\Delta$ 63, <i>ura3</i> $\Delta$ 0, <i>SPT7-(Flag1)-TAP::TRP1</i> , $\Delta$ <i>sgf73::KanMX</i> |
| <b>YHY86</b> | pYH67 | <i>mata</i> , $\Delta$ <i>ade2::hisG</i> , <i>his3</i> $\Delta$ 200, <i>leu2</i> $\Delta$ 0, <i>lys2</i> $\Delta$ 0, <i>met15</i> $\Delta$ 0, <i>trp1</i> $\Delta$ 63, <i>ura3</i> $\Delta$ 0, <i>Ubp8-3HA::His3MX6</i> , $\Delta$ <i>sgf73::KanMX</i>      |

Table S5. (B) Plasmids used in this study.

| <b>Plasmid name</b> | <b>Insert</b>                                                                                                             |
|---------------------|---------------------------------------------------------------------------------------------------------------------------|
| <b>pYH1</b>         | Spt3 ORF with E240K (401), 608bp promoter sequence, 726bp of sequence past stop codon                                     |
| <b>pYH28</b>        | Sgf73 ORF with 3xFlag on C-terminus, 500bp promoter sequence, 100bp of sequence past stop codon                           |
| <b>pYH30</b>        | Ada3 ORF with 3xFlag on C-terminus, 500bp promoter sequence, 106bp of sequence past stop codon                            |
| <b>pYH31</b>        | Sgf73 ORF $\Delta$ residues 196-314 with 3xFlag on C-terminus, 500bp promoter sequence, 100bp of sequence past stop codon |
| <b>pYH32</b>        | Sgf73 ORF $\Delta$ residues 350-479 with 3xFlag on C-terminus, 500bp promoter sequence, 100bp of sequence past stop codon |
| <b>pYH33</b>        | Sgf73 ORF $\Delta$ residues 535-575 with 3xFlag on C-terminus, 500bp promoter sequence, 100bp of sequence past stop       |

|              |                                                                                                                    |
|--------------|--------------------------------------------------------------------------------------------------------------------|
|              | codon                                                                                                              |
| <b>pYH36</b> | Ada3 ORF Δ residues 334-425 with 3xFlag on C-terminus, 500bp promoter sequence, 106bp of sequence past stop codon  |
| <b>pYH37</b> | Ada3 ORF Δ residues 483-616 with 3xFlag on C-terminus, 500bp promoter sequence, 106bp of sequence past stop codon  |
| <b>pYH38</b> | Ada3 ORF Δ residues 640-697 with 3xFlag on C-terminus, 500bp promoter sequence, 106bp of sequence past stop codon  |
| <b>pYH39</b> | Sgf73 ORF Δ residues 350-400 with 3xFlag on C-terminus, 500bp promoter sequence, 100bp of sequence past stop codon |
| <b>pYH40</b> | Sgf73 ORF Δ residues 401-479 with 3xFlag on C-terminus, 500bp promoter sequence, 100bp of sequence past stop codon |
| <b>pYH41</b> | Ada3 ORF Δ residues 483-534 with 3xFlag on C-terminus, 500bp promoter sequence, 106bp of sequence past stop codon  |
| <b>pYH42</b> | Ada3 ORF Δ residues 535-616 with 3xFlag on C-terminus, 500bp promoter sequence, 106bp of sequence past stop codon  |
| <b>pYH57</b> | Ada2 ORF with 3xFlag on N-terminus, 491bp promoter sequence, 100bp of sequence past stop codon                     |
| <b>pYH58</b> | Ada2 ORF Δ residues 232-317 with 3xFlag on N-terminus, 491bp promoter sequence, 100bp of sequence past stop codon  |
| <b>pYH59</b> | Ada2 ORF Δ residues 353-434 with 3xFlag on N-terminus, 491bp promoter sequence, 100bp of sequence past stop codon  |
| <b>pYH67</b> | Sgf73 ORF Δ residues 2-104 with 3xFlag on C-terminus, 500bp promoter sequence, 100bp of sequence past stop codon   |
