# Supplementary material
Source: PubMed Central journal article supplement (PMC4283410)

**A****Sgf73**

30°C

37°C

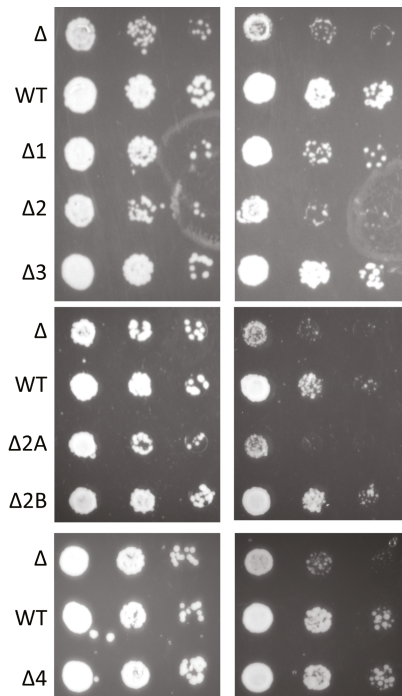**B****Ada2**

30°C

37°C

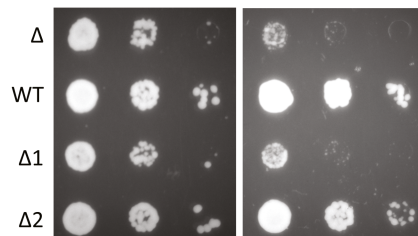**C****Ada3**

30°C

37°C

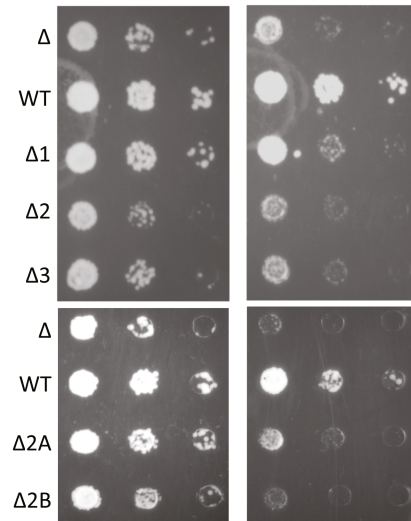

Supplement: embj0033-2534-sd10.pdf [file embj0033-2534-sd10.pdf]

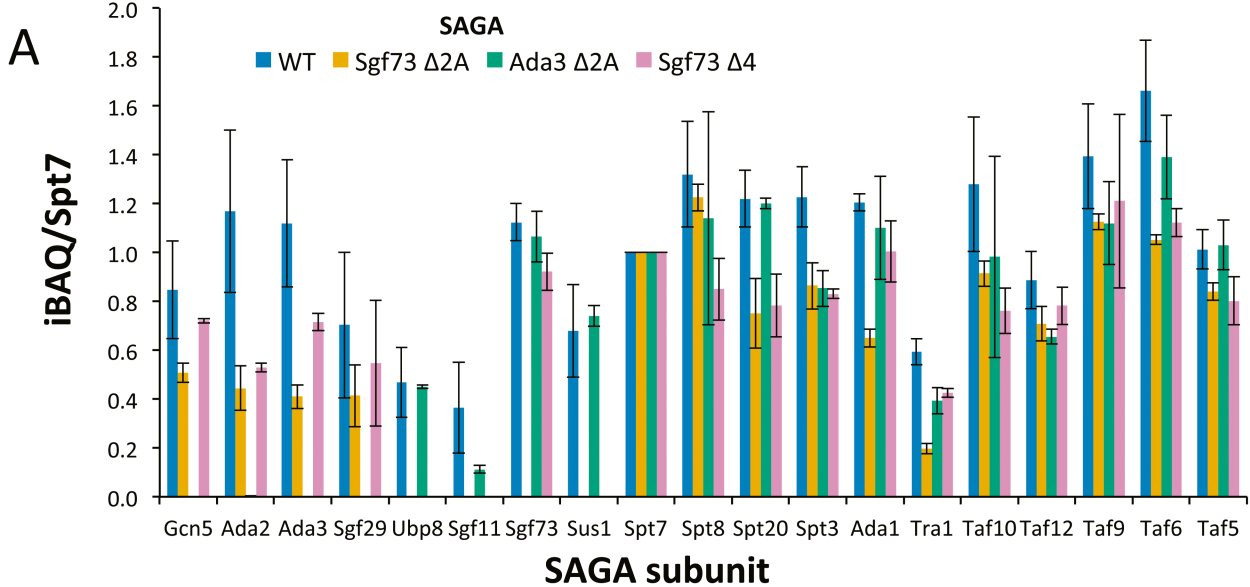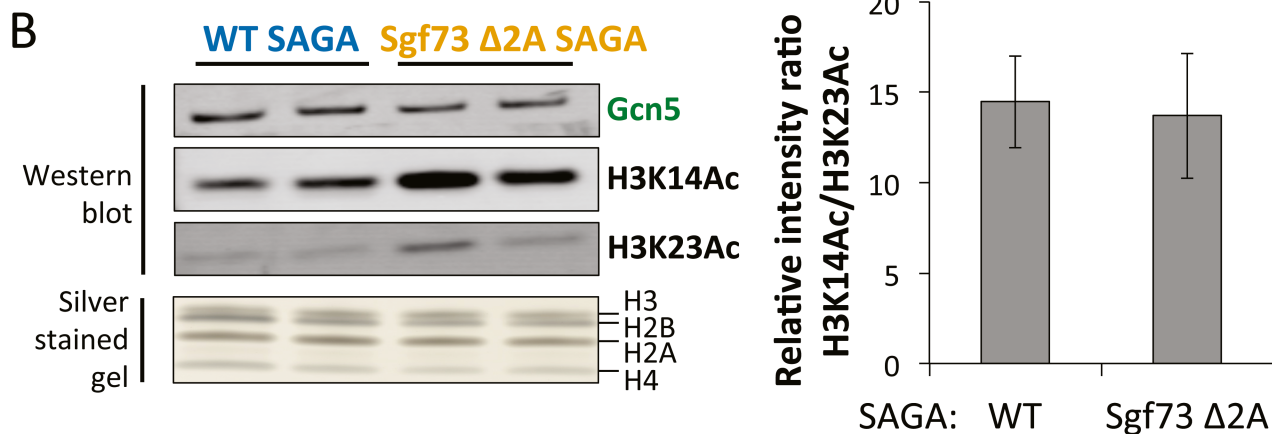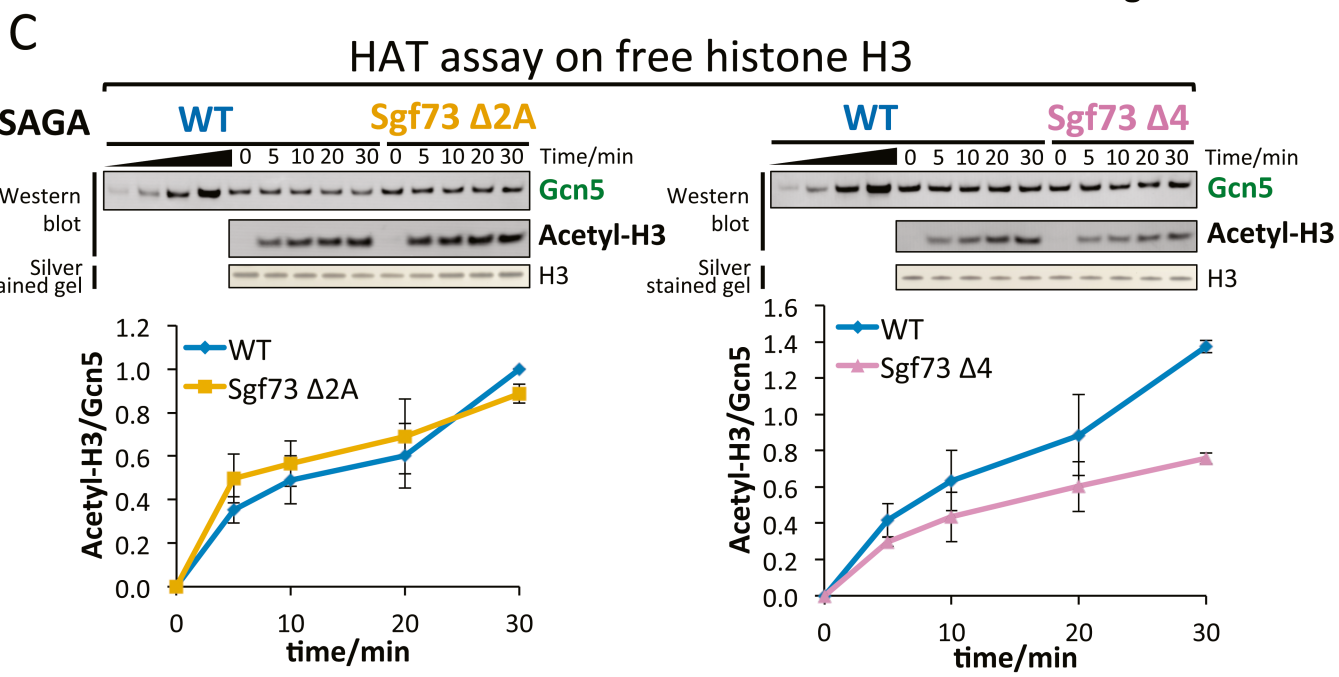

Supplement: embj0033-2534-sd11.pdf [file embj0033-2534-sd11.pdf]

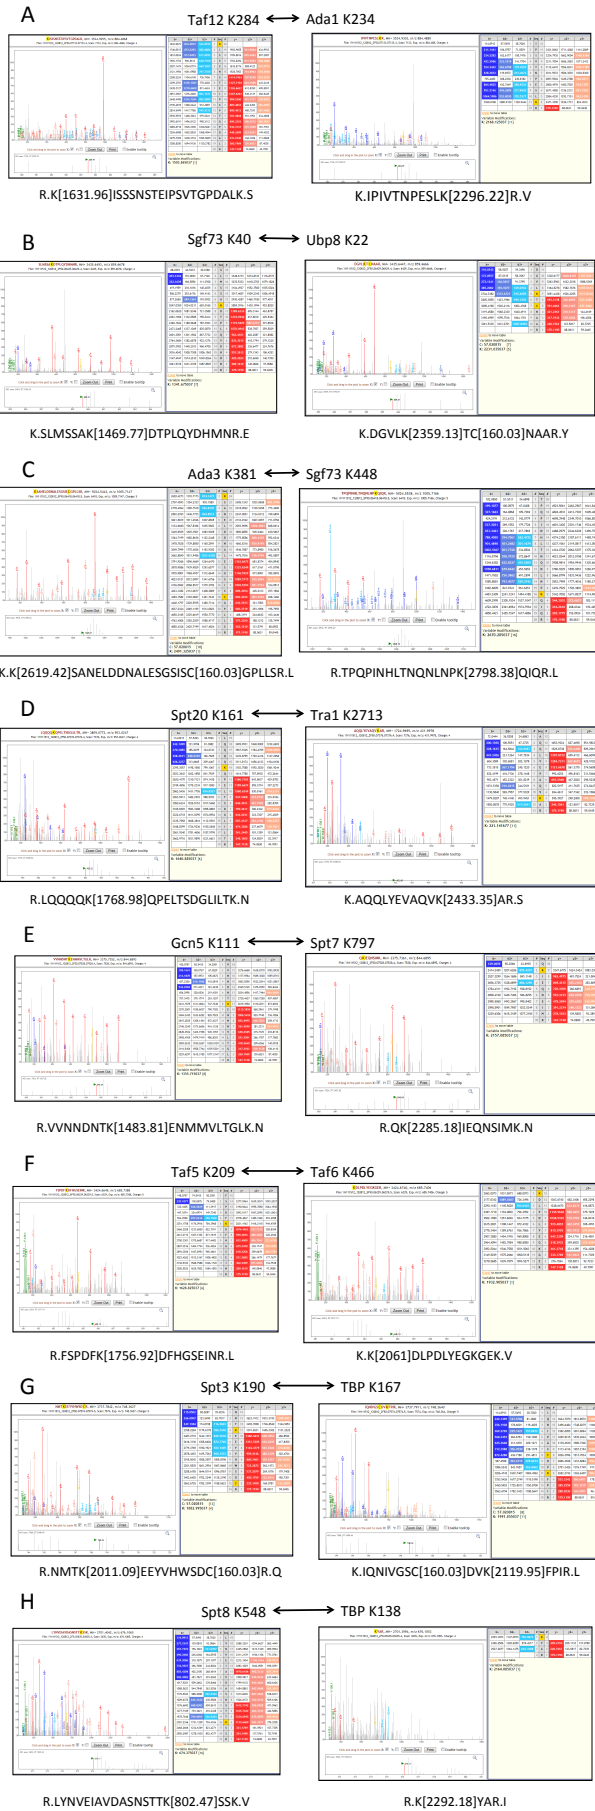

Supplement: embj0033-2534-sd13.pdf [file embj0033-2534-sd13.pdf]

Figure 1A

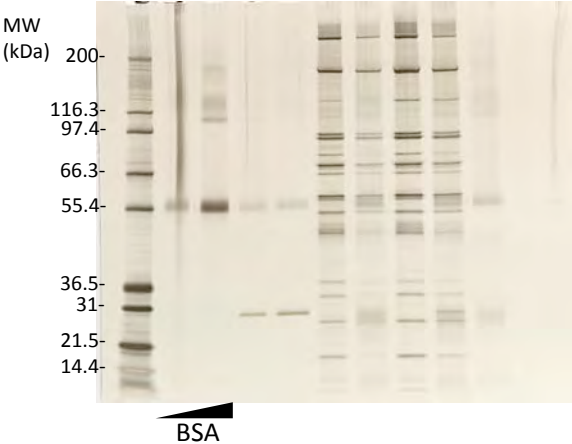

Figure 1B

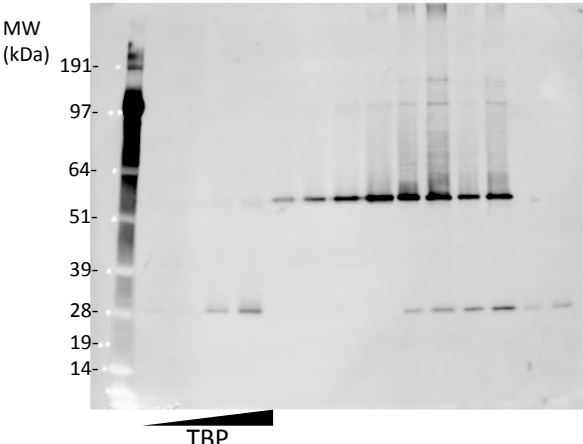

Supplement: embj0033-2534-sd2.pdf [file embj0033-2534-sd2.pdf]

Figure S1B

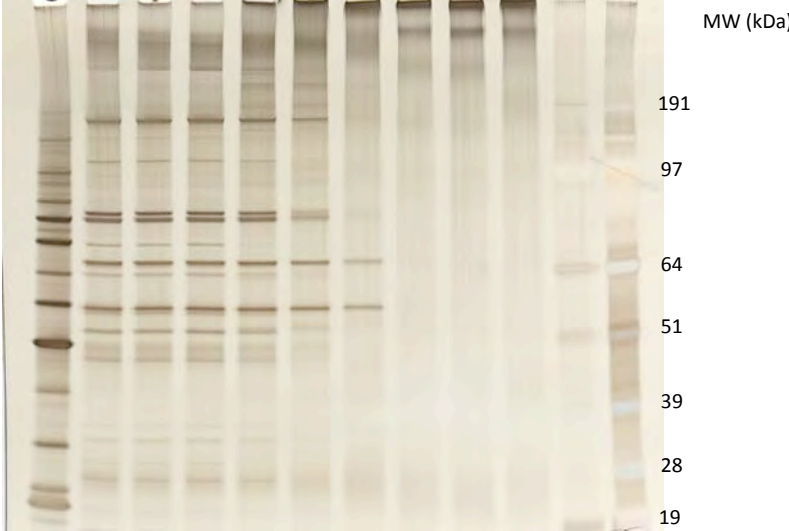

Supplement: embj0033-2534-sd20.pdf [file embj0033-2534-sd20.pdf]

Figure S5B

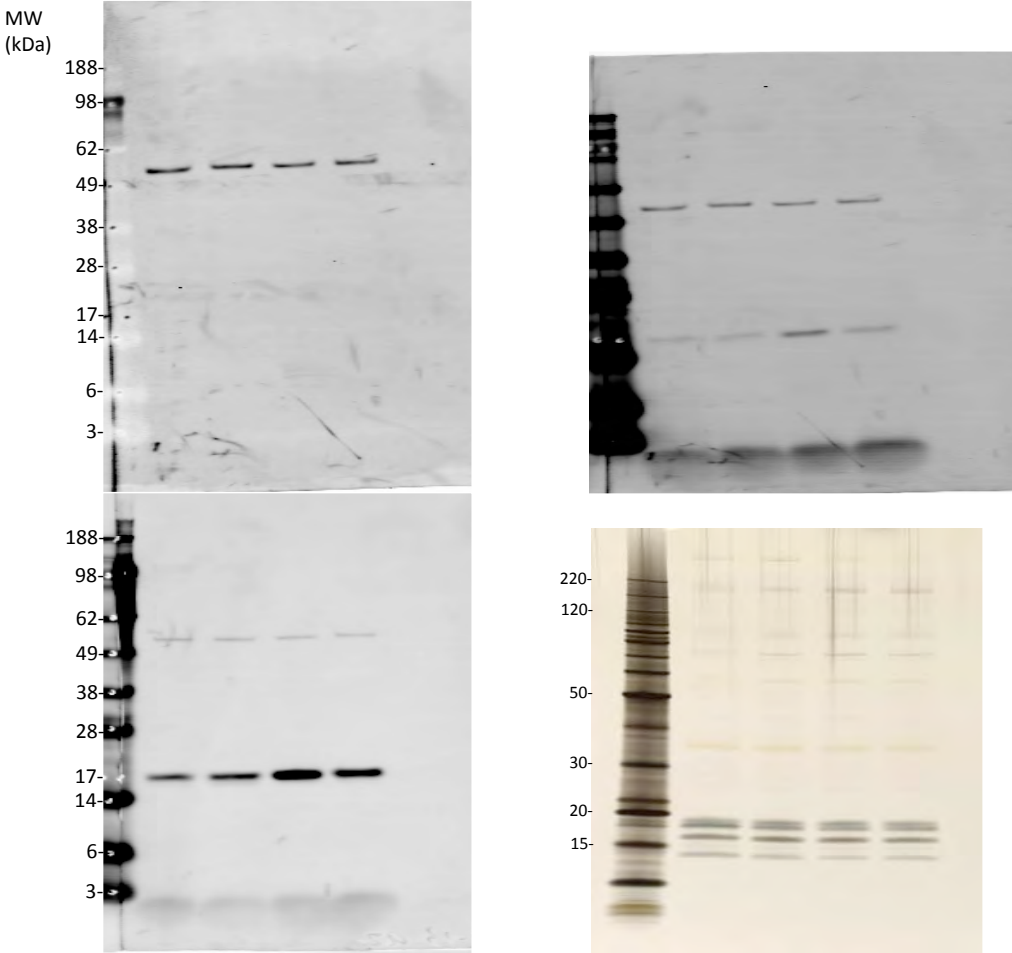

Supplement: embj0033-2534-sd21.pdf [file embj0033-2534-sd21.pdf]

Figure S5C

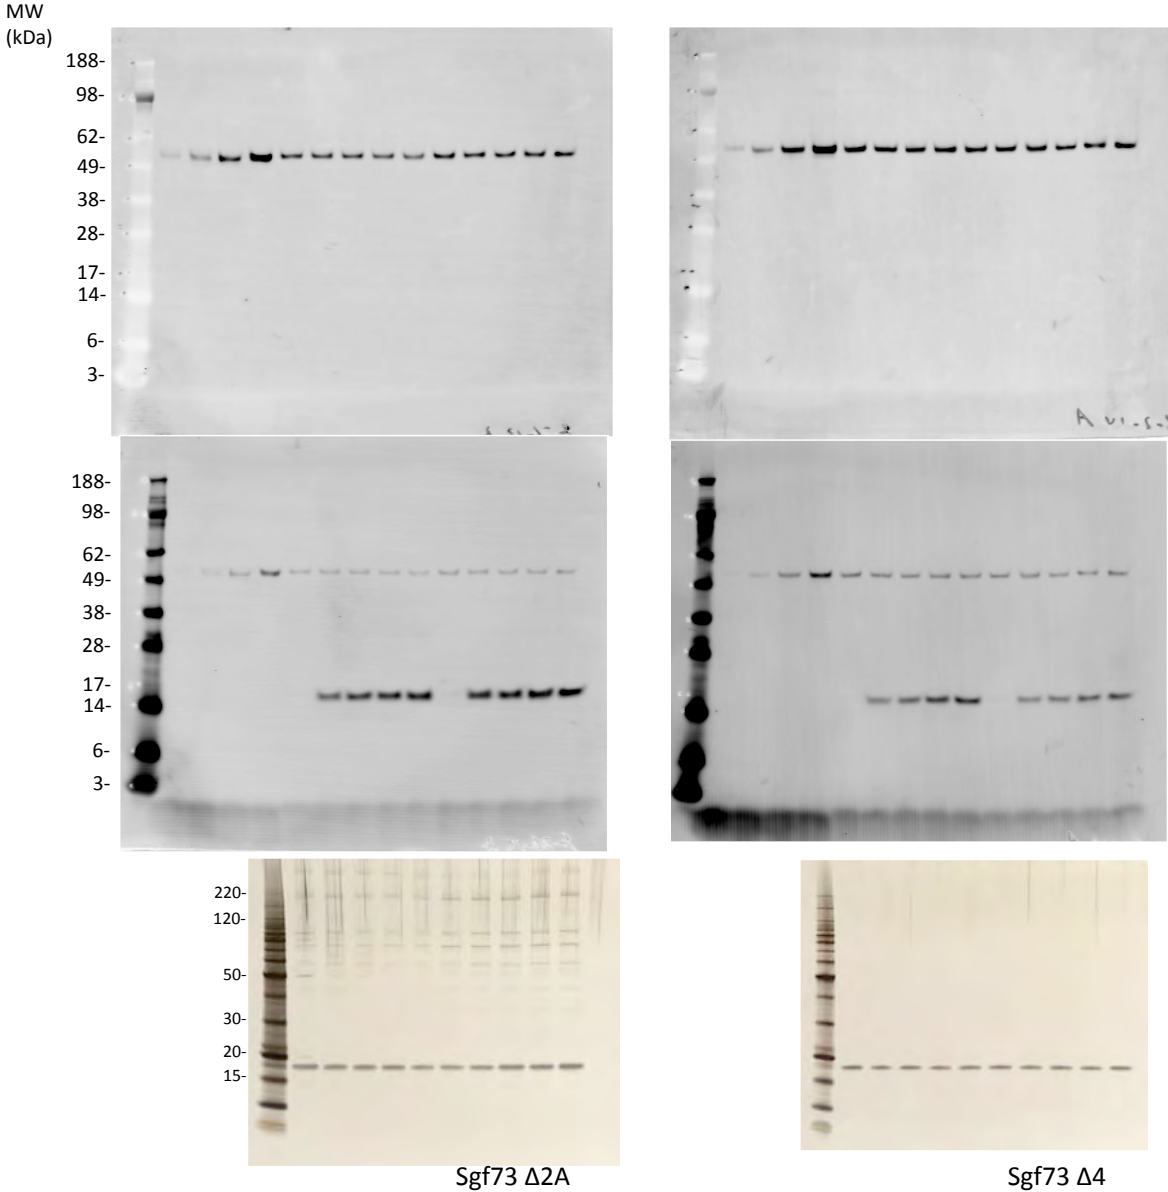

Supplement: embj0033-2534-sd22.pdf [file embj0033-2534-sd22.pdf]

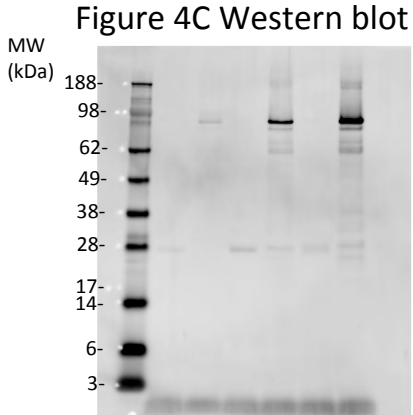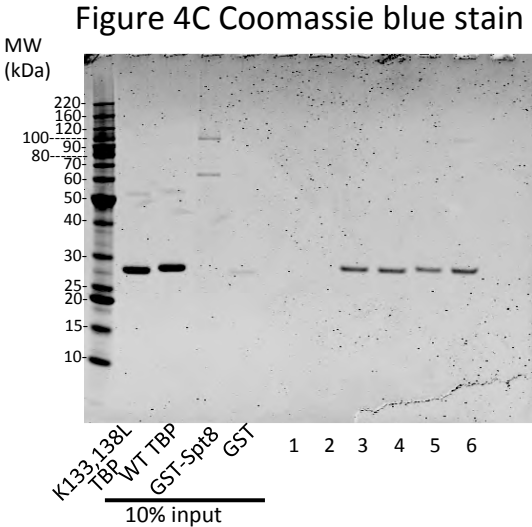

Supplement: embj0033-2534-sd3.pdf [file embj0033-2534-sd3.pdf]

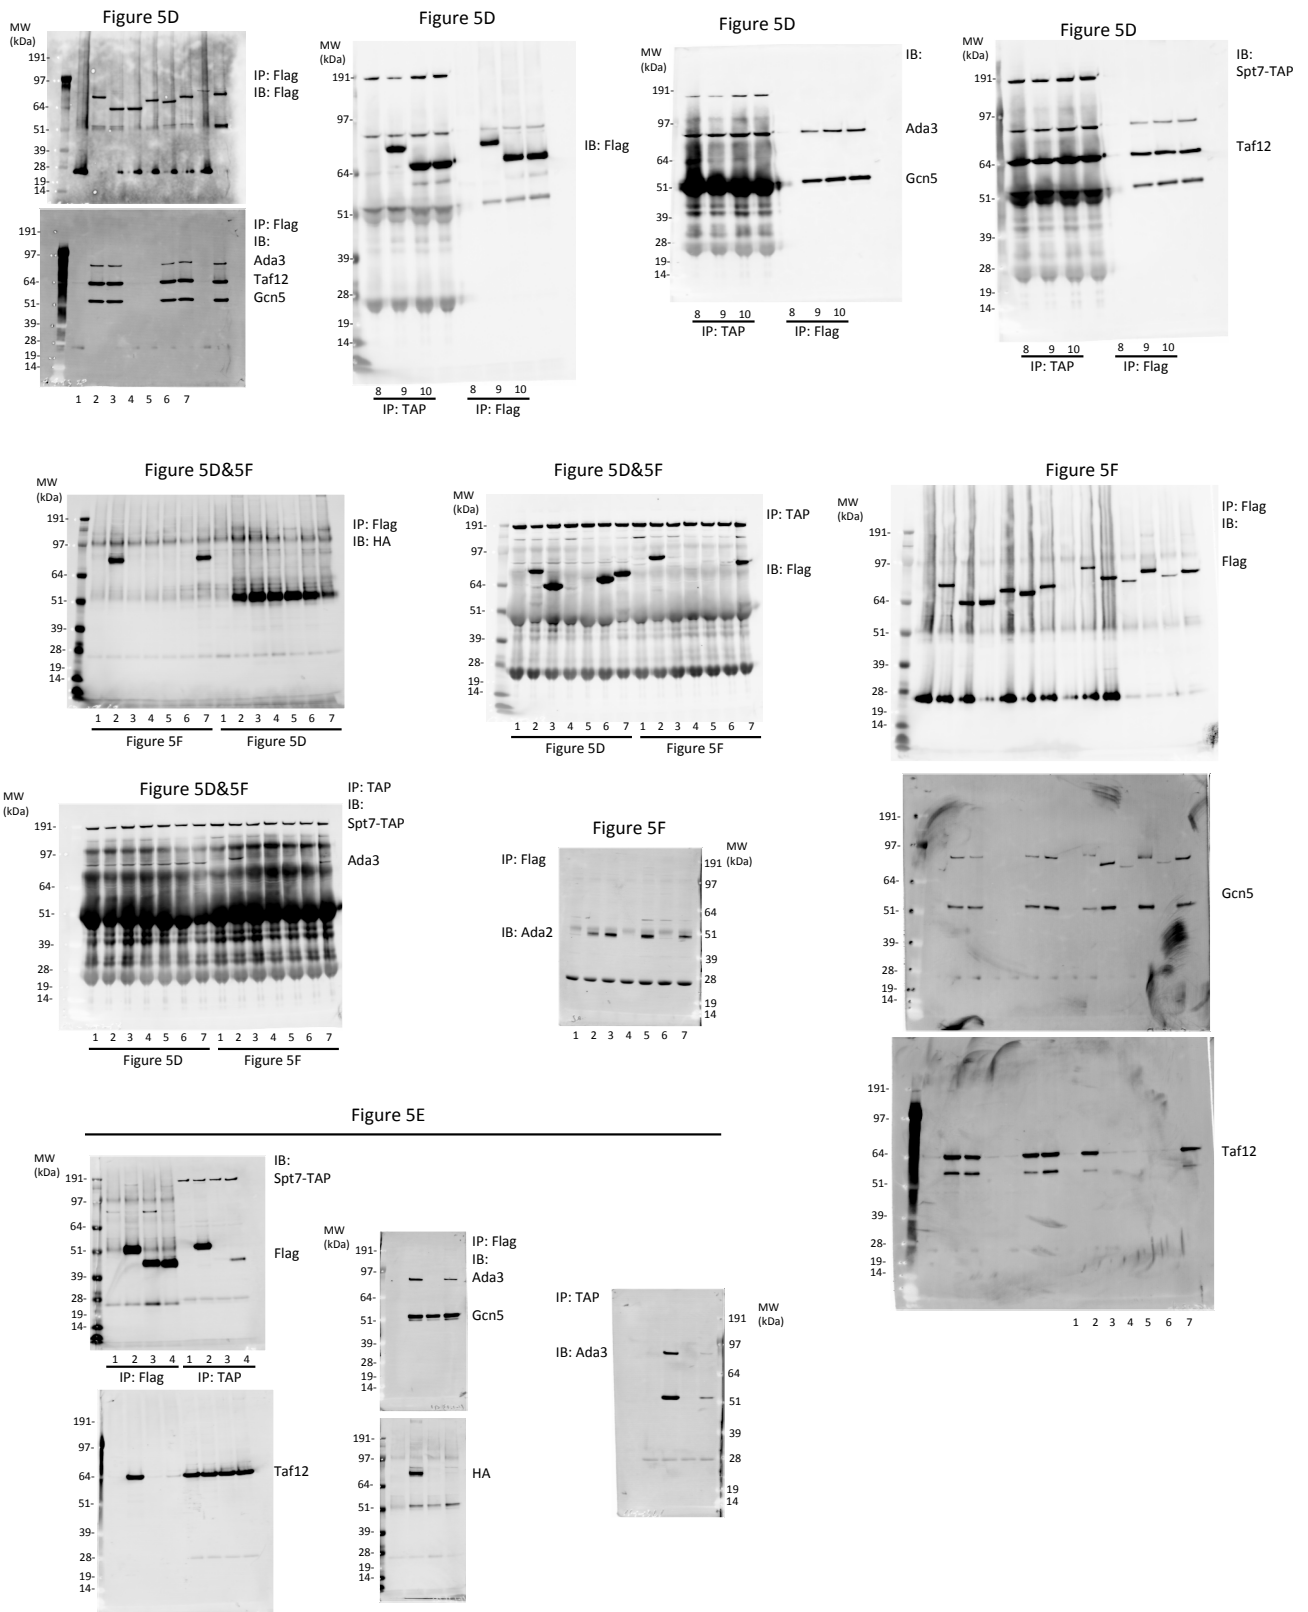

Supplement: embj0033-2534-sd4.pdf [file embj0033-2534-sd4.pdf]

Figure 6A

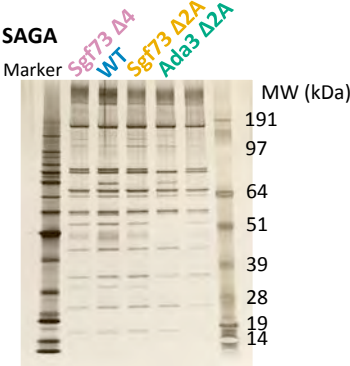

Figure 6C

Figure 6D

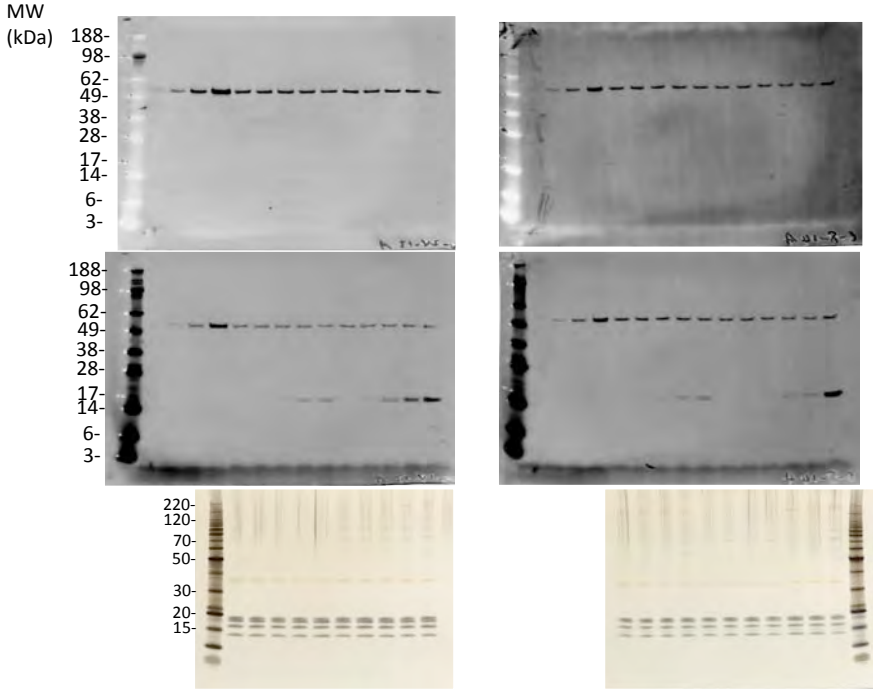

Supplement: embj0033-2534-sd5.pdf [file embj0033-2534-sd5.pdf]

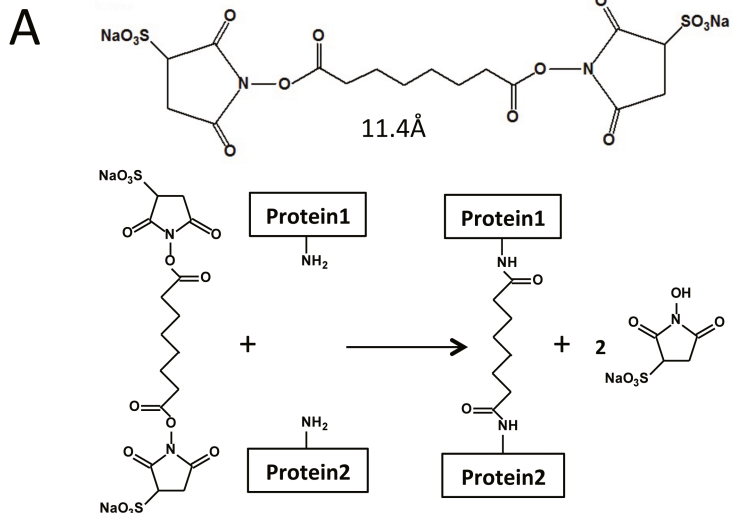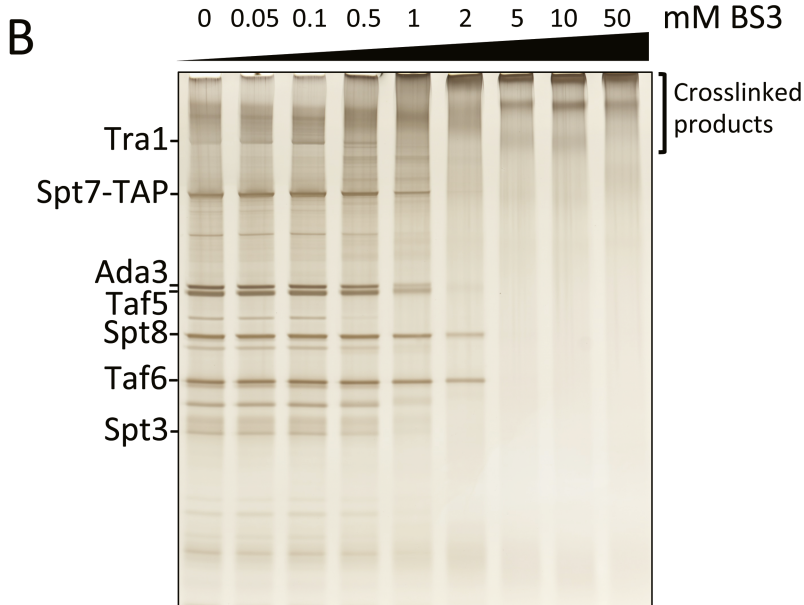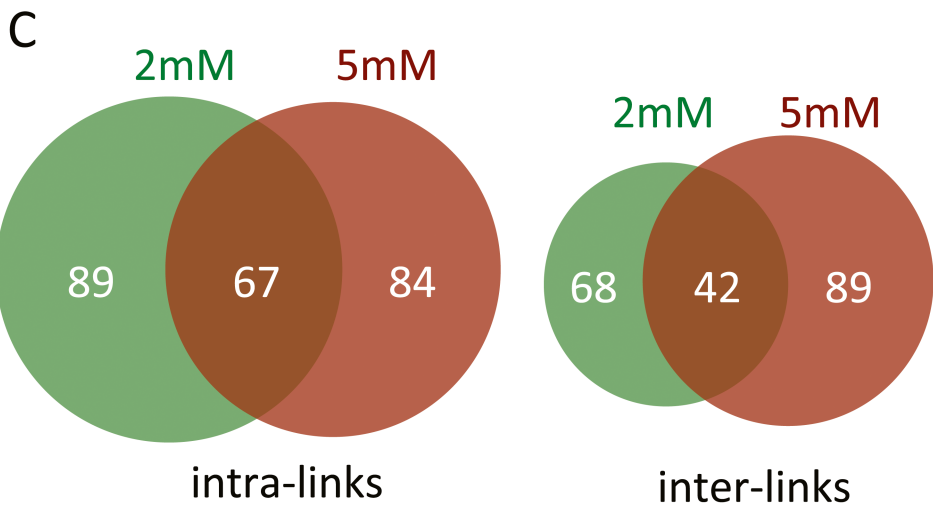

Supplement: embj0033-2534-sd6.pdf [file embj0033-2534-sd6.pdf]

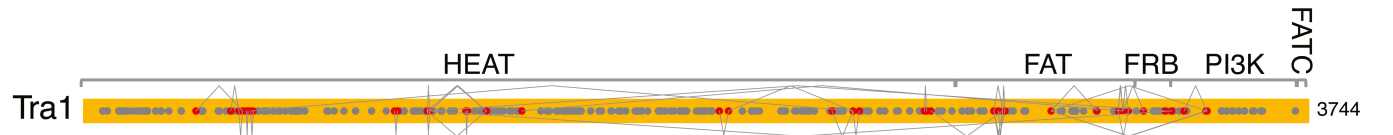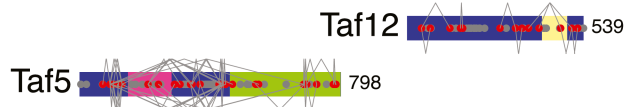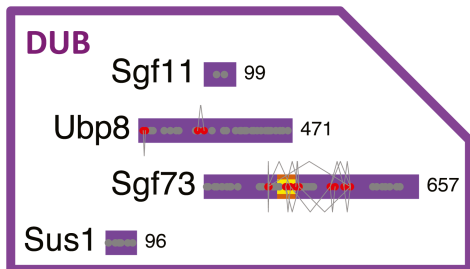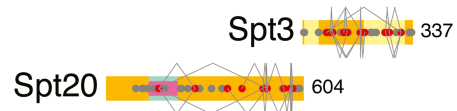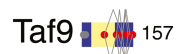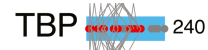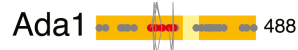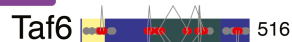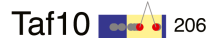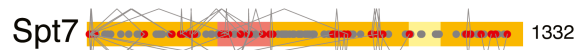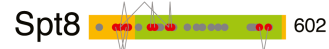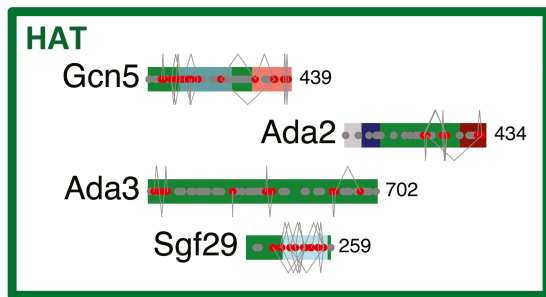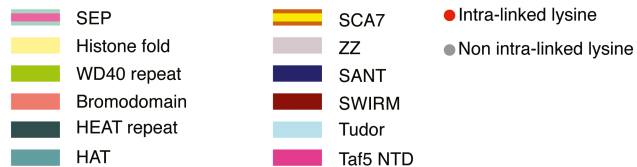

Supplement: embj0033-2534-sd7.pdf [file embj0033-2534-sd7.pdf]
